# Supplementary material for: Tuning electronic levels in photoactive hydroxylated titania nanosystems: combining the ligand dipole effect and quantum confinement
Source: Royal Society of Chemistry journal article supplement (doi:10.1039/d3nr06189b), 2024-01-01

**Electronic Supplementary Information for:**

**Tuning electronic levels in photoactive hydroxylated titania  
nanosystems: combining the ligand dipole effect and quantum  
confinement**

Miguel Recio-Poo,<sup>a</sup> Ángel Morales-García,<sup>\*a</sup> Francesc Illas,<sup>a</sup> Stefan T. Bromley<sup>\*ab</sup>

<sup>a</sup> Departament de Ciència de Materials i Química Física & Institut de Química Teòrica i Computacional (IQTCUB), Universitat de Barcelona, c/Martí i Franquès 1-11, 08028 Barcelona, Spain

<sup>b</sup> Institució Catalana de recerca i Estudis Avançats (ICREA), Passeig Lluís Companys 23, 08010 Barcelona, Spain

\*Corresponding authors: [angel.morales@ub.edu](mailto:angel.morales@ub.edu) ; [s.bromley@ub.edu](mailto:s.bromley@ub.edu)

**Table S1.** Comparison of total energies for hydroxylated anatase slab models with  $\Gamma$  point and  $5\times 5\times 1$  k-point sampling.

|                                         | Degree of hydroxylation |              |              |
|-----------------------------------------|-------------------------|--------------|--------------|
|                                         | 0%                      | 50%          | 100%         |
| $\Gamma$ point                          | -1972829.149            | -1985324.399 | -1997809.979 |
| $5\times 5\times 1$                     | -1972828.579            | -1985323.859 | -1997809.445 |
| $\Delta E$ per $\text{TiO}_2$ unit (eV) | -0.00791                | -0.00749     | -0.00741     |

**Figure S1.** Evolution of the LUMO+5, LUMO+4, LUMO+3, LUMO+2, LUMO+1, HOMO-1, HOMO-2, HOMO-3, HOMO-4, HOMO-5 orbital energies corresponding to faceted  $(\text{TiO}_2)_{35}$  NP.

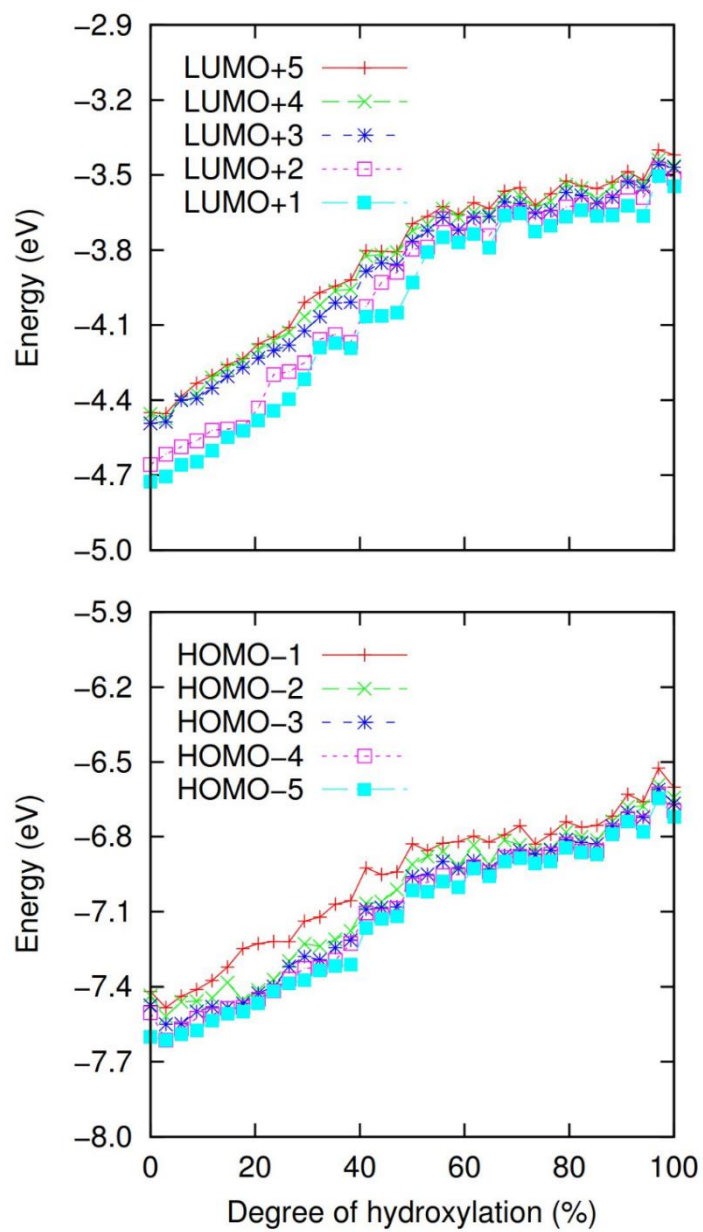

**Figure S2** Evolution of HOMO, LUMO and a deeper lying energy level for the faceted  $(\text{TiO}_2)_{35}$  and  $(\text{TiO}_2)_{165}$  NPs. Besides of proving again the electrostatic nature of the ligand dipole effect, the considerably slower slopes in the HOMO and LUMO levels with respect to the deeper orbitals (i.e. HOMO-250 for the  $(\text{TiO}_2)_{35}$  NP and HOMO-500 for the  $(\text{TiO}_2)_{165}$  NP) shows the stabilization happening due to defects healing effect upon hydroxylation.

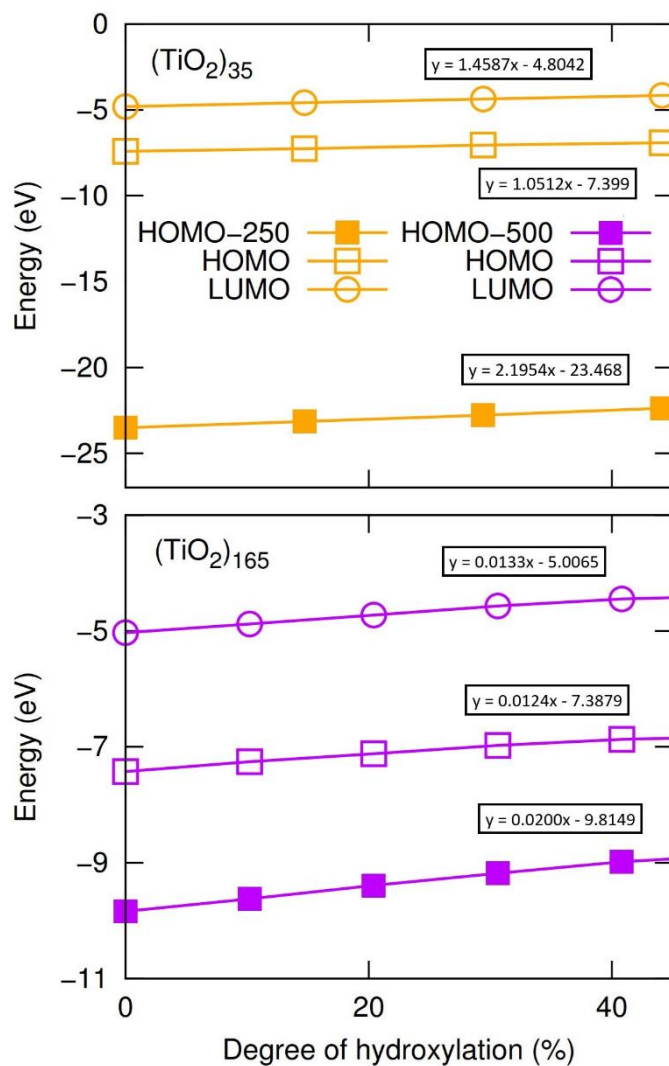

**Figure S3** Evolution of both the average value of  $\alpha$  and  $\Delta Q_{OH}$  with respect to the degree of hydroxylation for the  $n = 35$  and  $n = 165$   $(TiO_2)_n$  anatase NPs is provided in the SI.

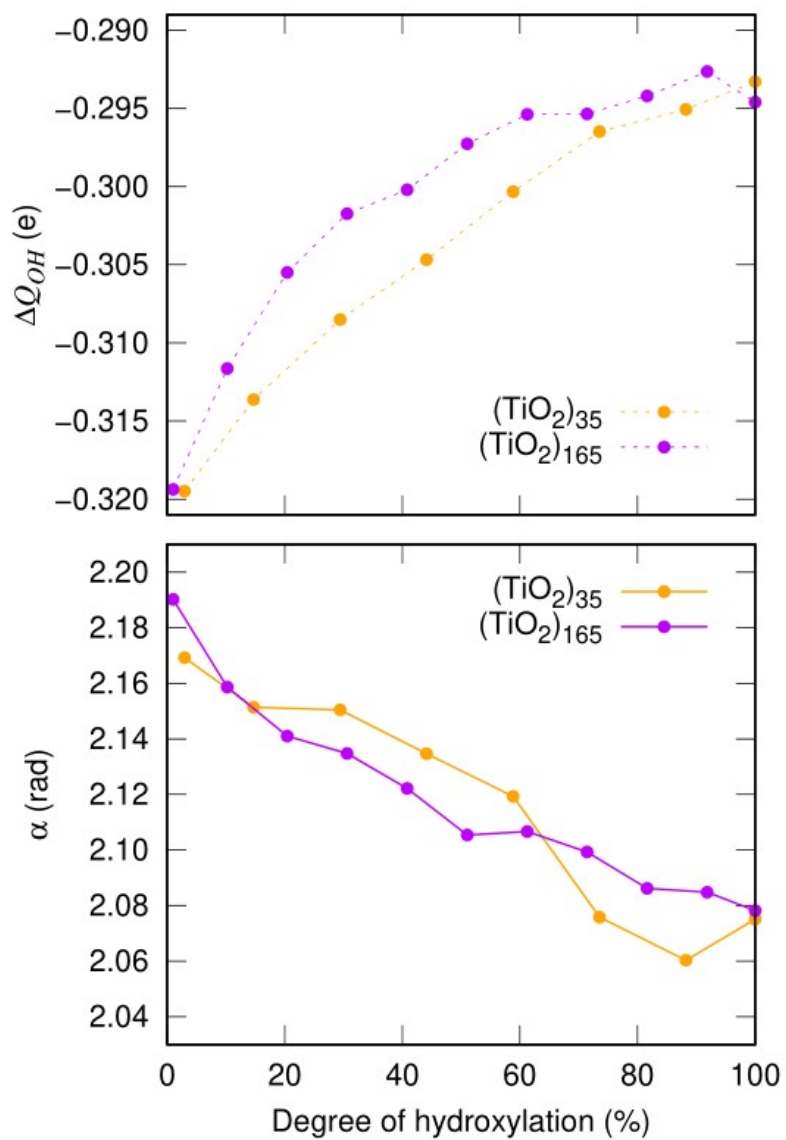

Supplement: d3nr06189b2.pdf [file d3nr06189b2.pdf]
